# Supplementary material
Source: publisher site journal article supplement (https://www.spandidos-publications.com/2035/downloadSupplementary)

Figure S1. Frequency distribution of serum sodium levels within the cohort.

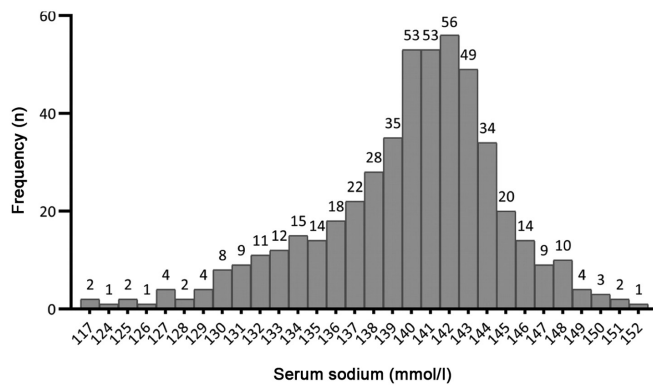

Supplement: Supplementary file 1 [file downloadSupplementary]
